# Supplementary material for: The Role of Caregiver’s Feeding Pattern in the Association between Parents’ and Children’s Healthy Eating Behavior: Study in Taichung, Taiwan
Source: MDPI journal article supplement (doi:10.3390/children8050369), 2021-05-08
Supplement: s1 [file s1]

- A1. Children's current height: cm (please fill in)
- A2. Children's current weight: kg (please fill in)
- A3. The gender of the child: ☐ (1) male ☐ (2) female
- A4. Age of children: ☐ (1) under 3 years old ☐ (2) over 3 years old to under 4 years old (3) ☐ over 4 years old to under 5 years old (4) 5 years old to less than 6 years old ☐ (5) 6 years old (inclusive) and above
- A5. Infant's birth order: ☐ (1) Only child ☐ (2) First child ☐ (3) Second child ☐ (4) Third child ☐ (5) Fourth (inclusive) and above
- A6. Living area: ☐ (1) Taichung City (District) ☐ (2) Nantou County (City) ☐ (3) Changhua County (City)
- A7. The main caregiver of the infant's diet: (single choice)  
☐ (1) mother ☐ (2) father ☐ (3) grandparents  
☐ (4) Nanny ☐ (5) Other relatives
- A8. The age of the main caregiver for the infant's diet:  
☐ (1) Under 25 years old (inclusive) ☐ (2) 26-30 years old ☐ (3) 31-35 years old ☐ (4) 36-40 years old  
☐ (5) 41-45 years old ☐ (6) 46-50 years old ☐ (7) 51 years old (inclusive)
- A9. Educational level of the main caregivers of young children's diet:  
☐ (1) Elementary school ☐ (2) Junior high school and below ☐ (3) Junior high school  
☐ (4) High school (vocational) ☐ (5) Junior college ☐ (6) University and graduate school

## Items in the questionnaire for healthy eating and feeding practices

### A. Parent's healthy eating behavior

|                                                                                                 |      |       |
|-------------------------------------------------------------------------------------------------|------|-------|
| 1. Never: 0% of occurrence                                                                      | Mean | S. D. |
| 2. Rarely: up to 25% of occurrence                                                              |      |       |
| 3. Sometimes: about 25~50% of occurrence                                                        |      |       |
| 4. Often: 51~75% of occurrence                                                                  |      |       |
| 5. Always: 75~100% of occurrence                                                                |      |       |
| B1. I watch TV while eating.                                                                    | 3.14 | 0.93  |
| B2. I chew slowly when I eat.                                                                   | 3.71 | 0.99  |
| B3. I pick up the food on the table and eat it.                                                 | 2.94 | 0.90  |
| B4. I collect and receive updated information about diet and health continuously.               | 3.61 | 0.93  |
| B5. I take snacks (such as chocolate, biscuits, cakes, etc.).                                   | 3.25 | 0.79  |
| B6. I eat fast food (such as burgers, fryer, pizza, etc.).                                      | 3.12 | 0.68  |
| B7. I drink sugary drinks (such as soft drinks, commercially available juices, milk tea, etc.). | 3.21 | 0.86  |
| B8. I take late night snack                                                                     | 3.09 | 0.73  |
| B9. I eat at least a fist-sized amount of vegetables every day.                                 | 3.84 | 0.89  |
| B10. I eat at least a fist-sized amount of fruit every day.                                     | 3.75 | 0.98  |
| B11. I am a picky eater.                                                                        | 3.31 | 0.93  |
| B12. I wash my hands before meals, clean my teeth after meals                                   | 3.47 | 0.75  |

B1, B3, B5, B6, B7, B8, B11 are reverse questions, and means (and s. d.) figures for these are computed with re-coded values for healthy behaviors.

## B. The caregiver's feeding practices

| 1. "Highly Disagree",<br>2. "Disagree",<br>3. "Neutral",<br>4. "Agree",<br>5. "Highly Agree"                                               | Mean | S. D. |
|--------------------------------------------------------------------------------------------------------------------------------------------|------|-------|
| C1. I think breakfast is important, so I must eat breakfast.                                                                               | 4.50 | 0.66  |
| C2. Half an hour before the main meal, I do not provide my children snacks                                                                 | 4.31 | 0.67  |
| C3. I will limit the number and amount of snacks and drinks the child can eat.                                                             | 4.39 | 0.61  |
| C4. I will try different cooking methods to make children like food.                                                                       | 4.15 | 0.69  |
| C5. I will ask the child to help prepare meals to increase his interest in food.                                                           | 3.96 | 0.74  |
| C6. When a child tries new food or food that he doesn't like, I will praise him.                                                           | 4.46 | 0.60  |
| C7. I let the children have a fixed meal time.                                                                                             | 4.22 | 0.69  |
| C8. I will pay attention to the intake of children's meals.                                                                                | 4.27 | 0.63  |
| C9. No matter how much or less I eat, I will ask the child to eat every kind of food provided on the table.                                | 3.81 | 0.93  |
| C10. I think eating is just getting full, and it doesn't matter whether the nutrition is balance or not.                                   | 3.69 | 1.12  |
| C11. I think picky eating behavior will gradually improve as child grow up.                                                                | 3.19 | 1.08  |
| C12. I will feed my children because they eat too slowly.                                                                                  | 3.35 | 1.12  |
| C13. I will take the initiative to buy sugary drinks (such as soft drinks, commercially available juices, milk tea, etc.) for my children. | 3.74 | 1.09  |
| C14. As long as the children are willing to eat, it doesn't matter if they eat and play or watch TV while eating.                          | 3.75 | 1.00  |
| C15. I think there is no need at all to force a child to eat, he will eat when he is hungry.                                               | 3.30 | 0.99  |
| C16. I think children do not need to eat in a designated place.                                                                            | 3.68 | 1.09  |
| C17. For three meals, I only prepare the foods that the child likes or prefers.                                                            | 3.64 | 1.07  |
| C18. I will let children eat sweets.                                                                                                       | 3.18 | 0.93  |
| C19. I will agree to my child's request to go to a fast food restaurant.                                                                   | 3.27 | 0.97  |

C10~C19 are reverse questions, and means (and s. d.) figures for these are computed with re-coded values for healthy behaviors.

### C. Children's healthy eating behavior

|                                                                                     |      |       |
|-------------------------------------------------------------------------------------|------|-------|
| 1. Never: 0% of occurrence                                                          | Mean | S. D. |
| 2. Rarely: up to 25% of occurrence                                                  |      |       |
| 3. Sometimes: about 25~50% of occurrence                                            |      |       |
| 4. Often: 51~75% of occurrence                                                      |      |       |
| 5. Always: 75~100% of occurrence                                                    |      |       |
| D1. Child watches TV while eating or play while eating.                             | 3.04 | 1.05  |
| D2. Child chews slowly when eating.                                                 | 3.46 | 0.95  |
| D3. The average time for child to eat exceeds 30 minutes.                           | 2.94 | 0.95  |
| D4. Child grabs food to eat with their hands.                                       | 3.30 | 0.84  |
| D5. When the child eats, he will sit and not run around until the meal is finished. | 3.12 | 1.03  |
| D6. The child does not talk when there is food in the mouth.                        | 3.02 | 0.91  |
| D7. Child drinks sugary drinks                                                      | 3.45 | 0.94  |
| D8. The child only eats certain types of food.                                      | 3.27 | 0.95  |
| D9. Children eat snacks (such as chocolate, biscuits, candies, etc.).               | 3.13 | 0.87  |
| D10. The child eat at least one fist sized amount of vegetables every day.          | 3.37 | 0.94  |
| D11. The child will eat at least one fist sized amount of fruit every day.          | 3.68 | 0.88  |
| D12. The child eats breakfast every day.                                            | 4.54 | 0.73  |
| D13. The child eats lunch every day.                                                | 4.64 | 0.61  |
| D14. The child eats dinner every day.                                               | 4.65 | 0.64  |
| D15. Child eats more the foods they like.                                           | 3.89 | 0.94  |
| D16. Child eats up all the food in her/his bowl.                                    | 3.81 | 0.95  |
| D17. Child eats the food he dislike as an exchange for other things.                | 3.83 | 1.26  |
| D18. Child washes hands before meals.                                               | 3.97 | 1.09  |
| D19. Child cleans teeth after meals.                                                | 3.35 | 1.03  |
| D20. Child takes strenuous exercise within half an hour after the meal.             | 3.61 | 1.01  |
| D21. Child helps clean up the tableware after eating.                               | 3.67 | 1.08  |

D1, D3, D4, D7~D9, D15, D17, D20 are reverse questions, and means (and s. d.) figures for these are computed with re-coded values for healthy behaviors.

**This is the end of the questionnaire, thank you for your participation.**
